# Supplementary material for: Photochemical age of air pollutants, ozone, and secondary organic aerosol in transboundary air observed on Fukue Island, Nagasaki, Japan
Source: Copernicus journal article supplement (doi:10.5194/acp-16-4555-2016), 2016-04-13
Supplement: Supplementary file 1 [file acp-16-4555-2016-supplement.pdf]

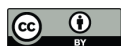

*Supplement of*

## **Photochemical age of air pollutants, ozone, and secondary organic aerosol in transboundary air observed on Fukue Island, Nagasaki, Japan**

**Satoshi Irei et al.**

*Correspondence to:* Satoshi Irei ([satoshi.irei@gmail.com](mailto:satoshi.irei@gmail.com))

The copyright of individual parts of the supplement might differ from the CC-BY 3.0 licence.

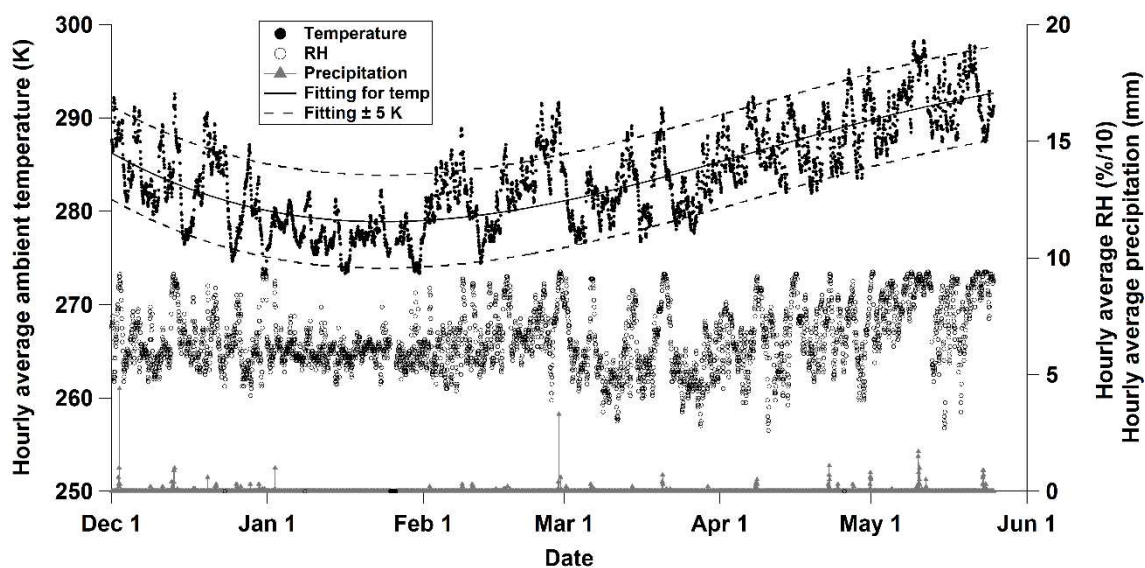

Figure S-1. Time-series plots of hourly average ambient temperature, relative humidity (RH), and precipitation during the field study.

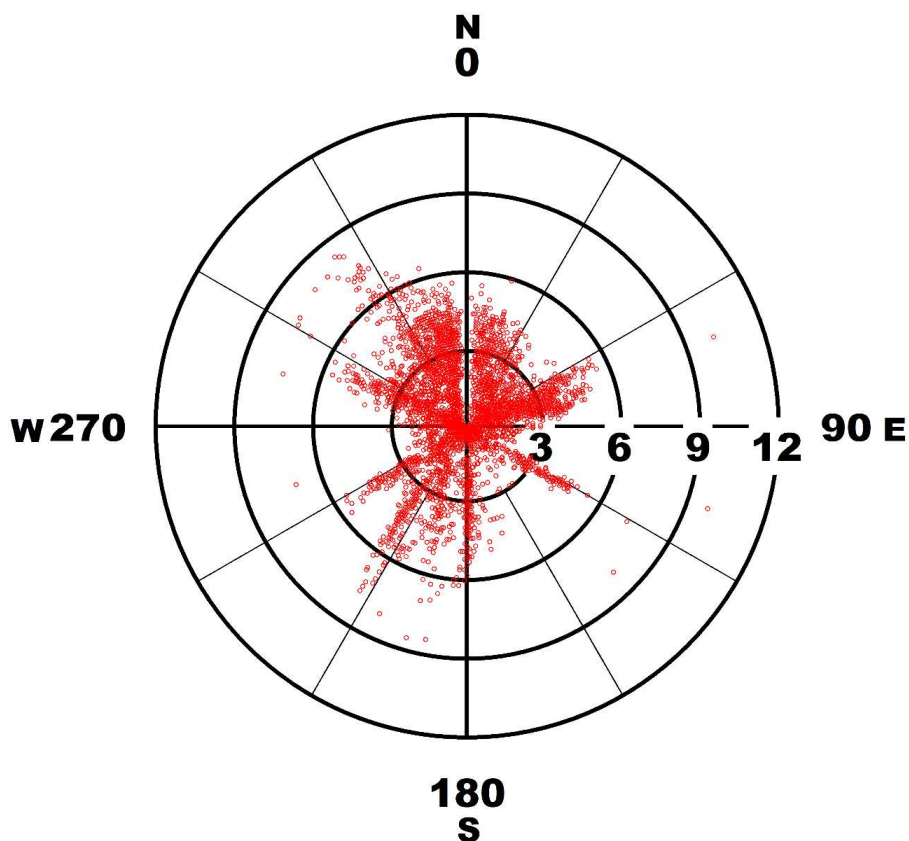

Figure S-2. Polar plot of the dependence of hourly average wind speed (radial axis in  $\text{m s}^{-1}$ ) on wind direction (degrees) observed at the Fukue monitoring station (north = 0 degrees, east = 90 degrees).

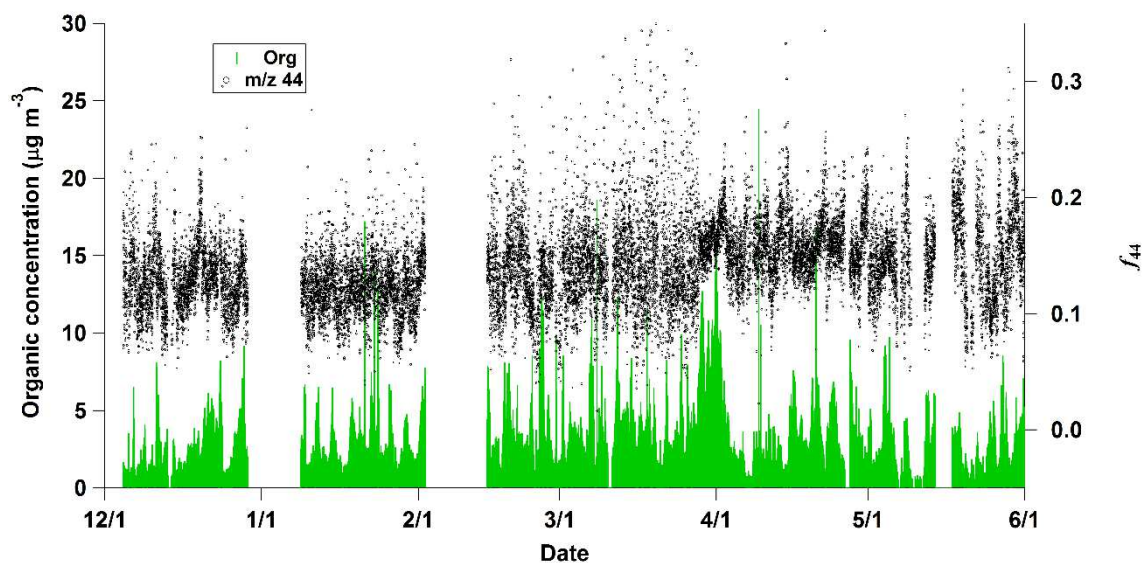

Figure S-3. Temporal variation of concentration of organic species and fraction due to  $m/z$  44,  $f_{44}$ , in the mass spectra of organic species measured by quadrupole aerosol mass spectrometry.

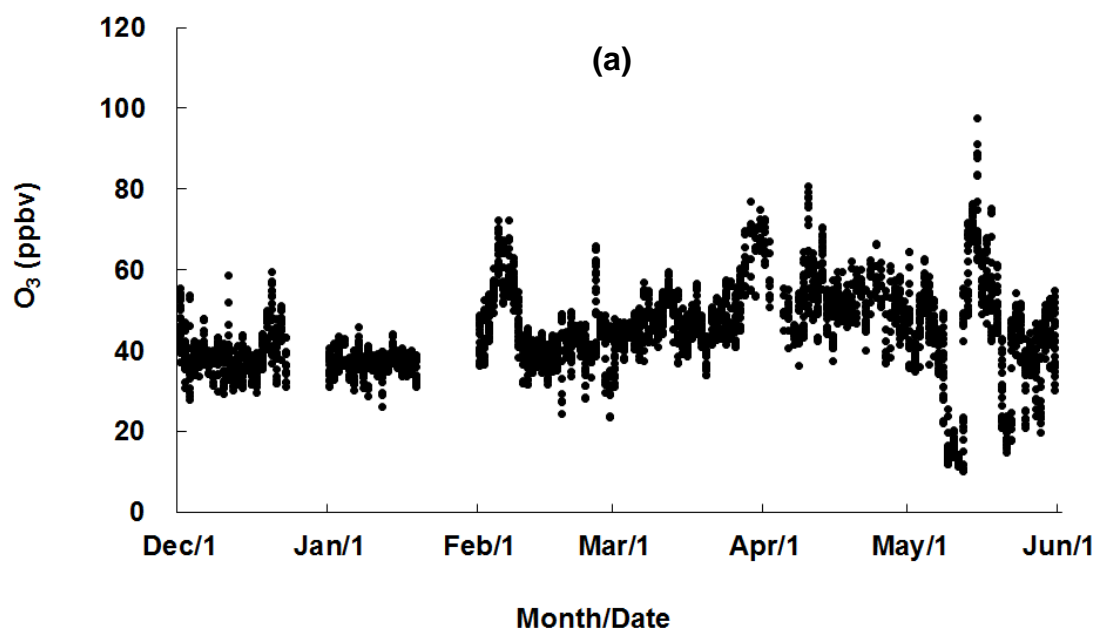

Figure S-4. Temporal variation of hourly average mixing ratios for (a)  $O_3$ , (b)  $NO_x$ , (c)  $NO_y$ , (d)  $CO$ , (e)  $i$ -pentane, (f) toluene, and (g) ethyne.

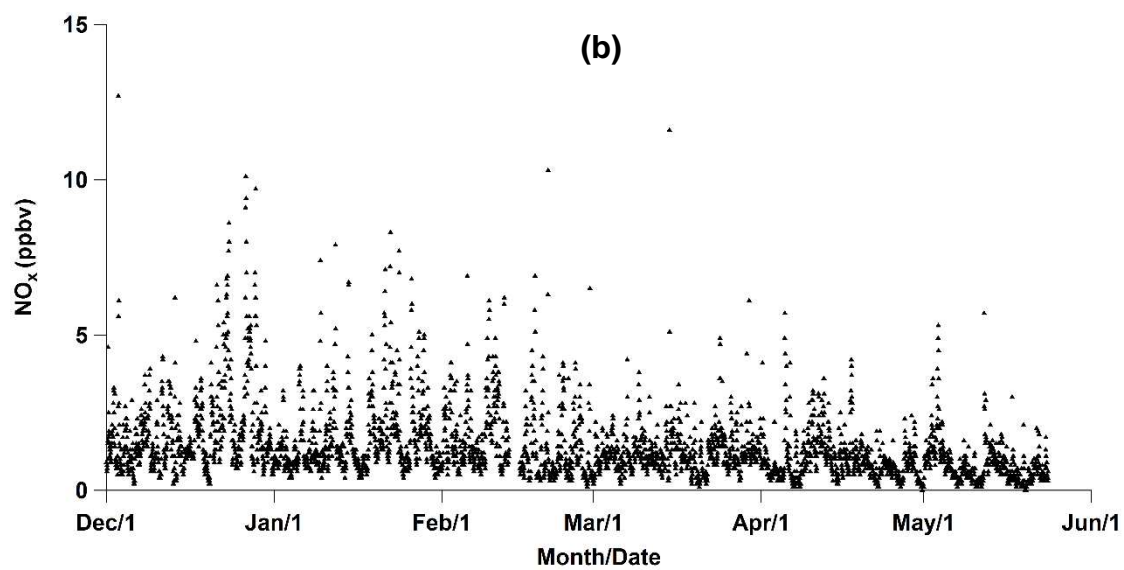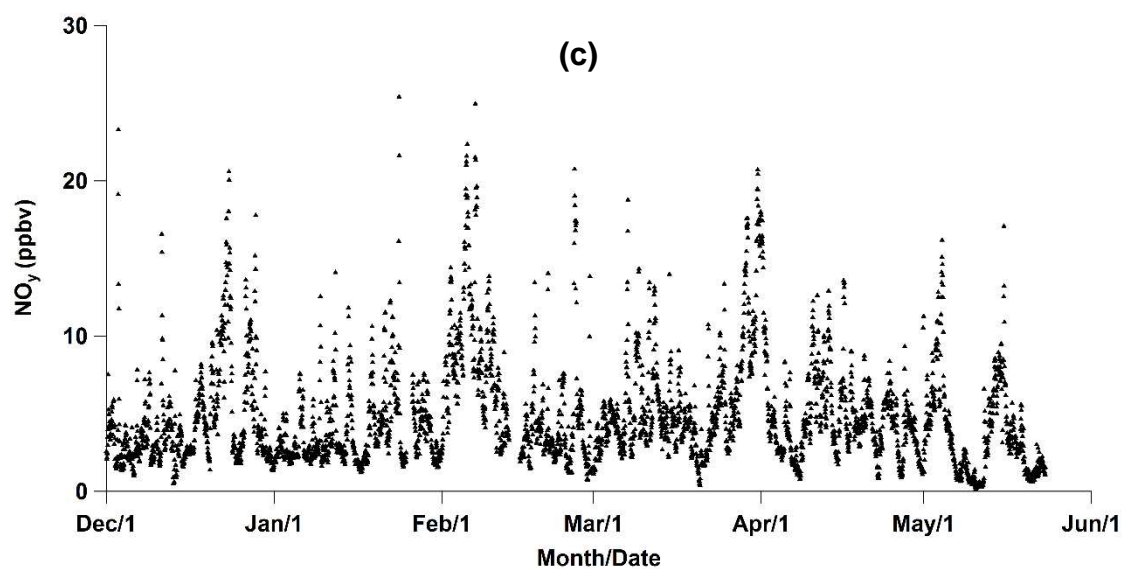

Figure S-4. Continued.

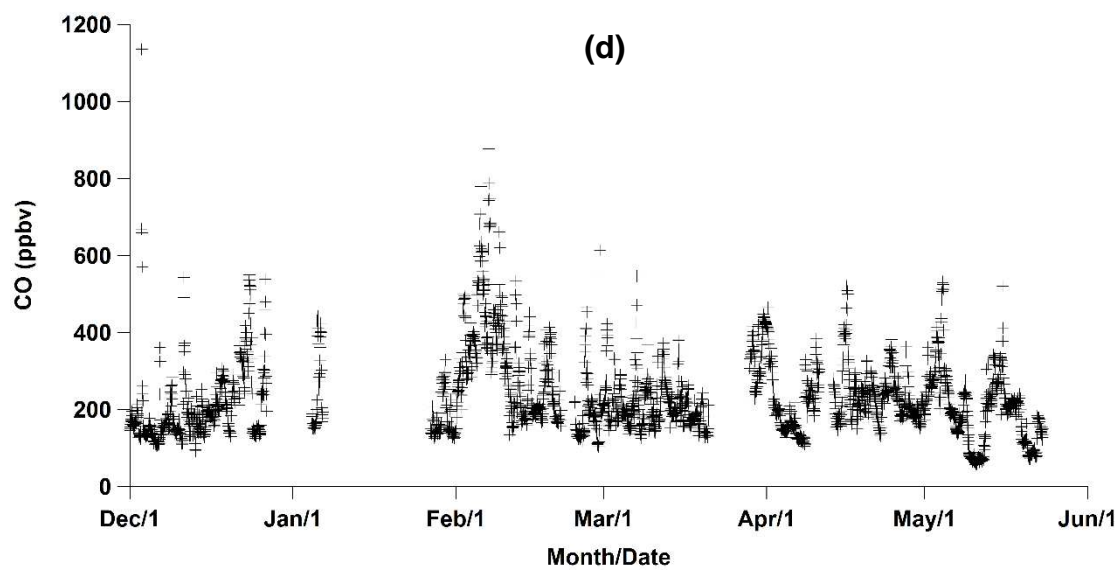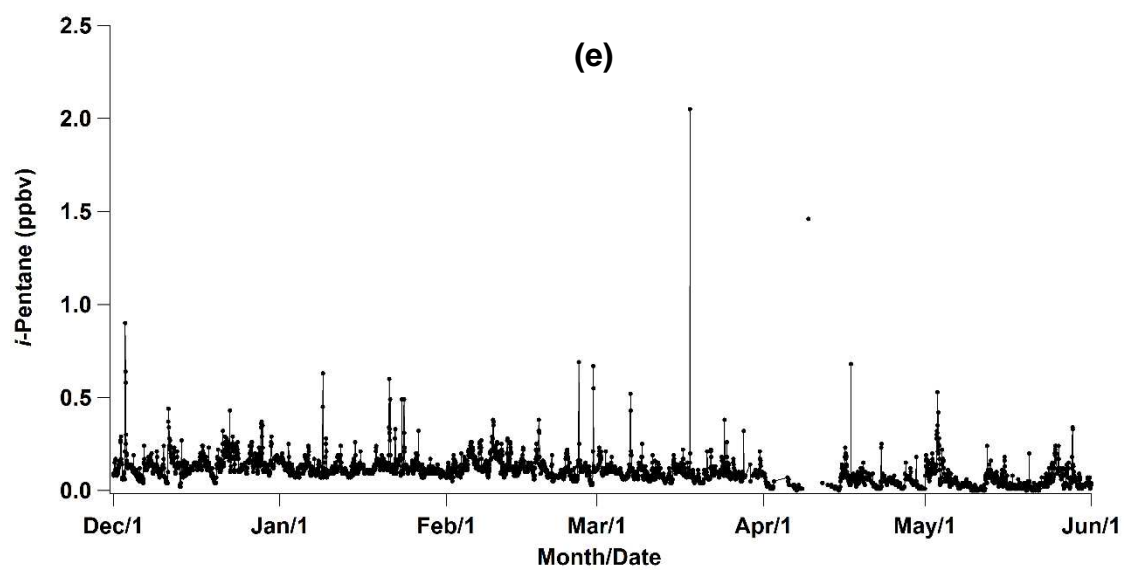

Figure S-4. Continued.

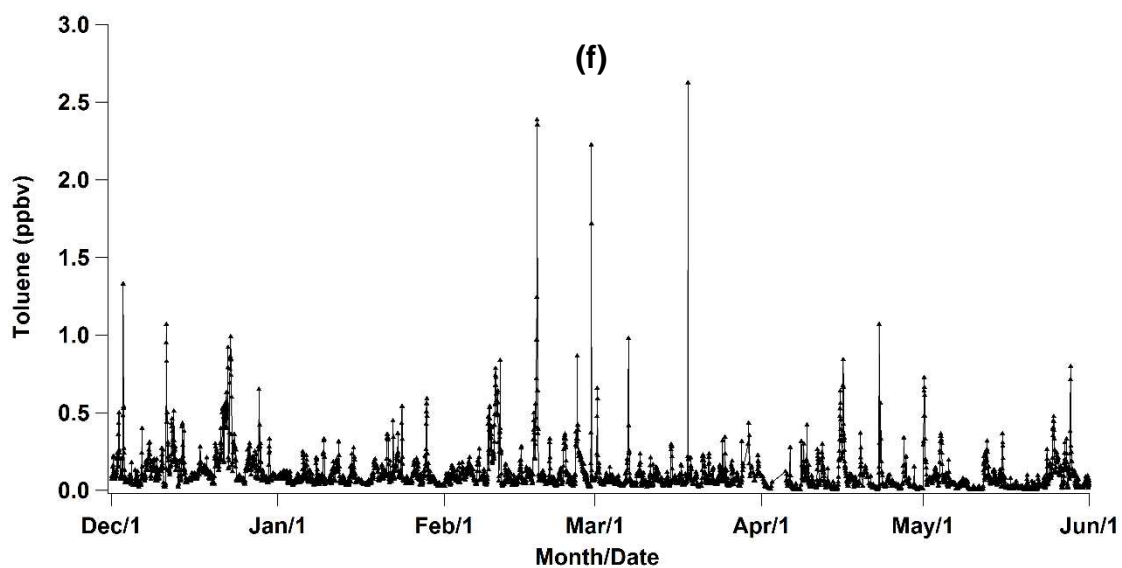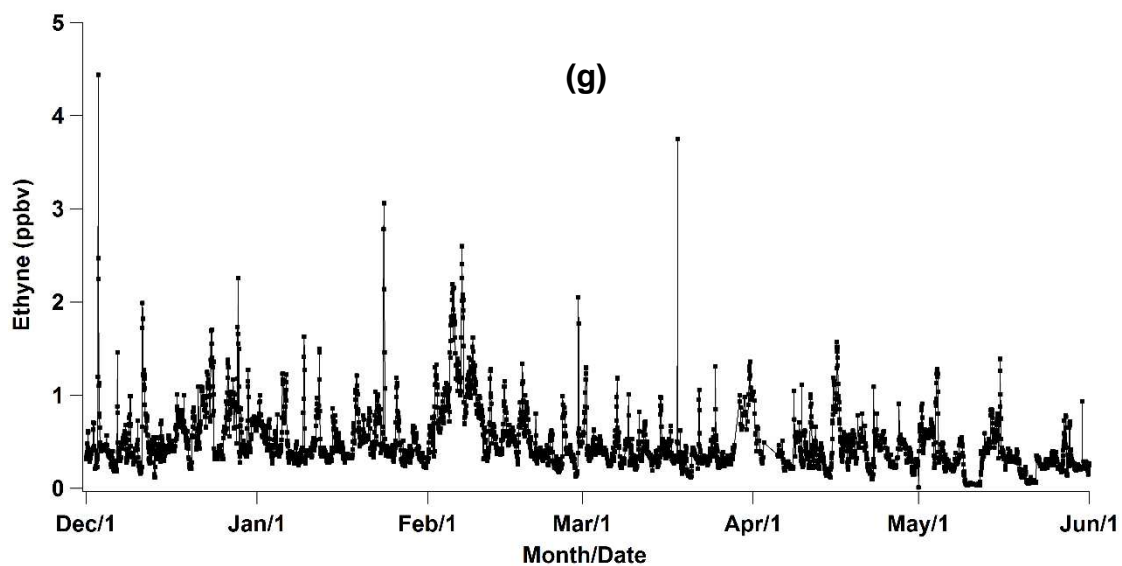

Figure S-4. Continued.

NOAA HYSPLIT MODEL  
Backward trajectories ending at 2100 UTC 11 May 11  
GDAS Meteorological Data

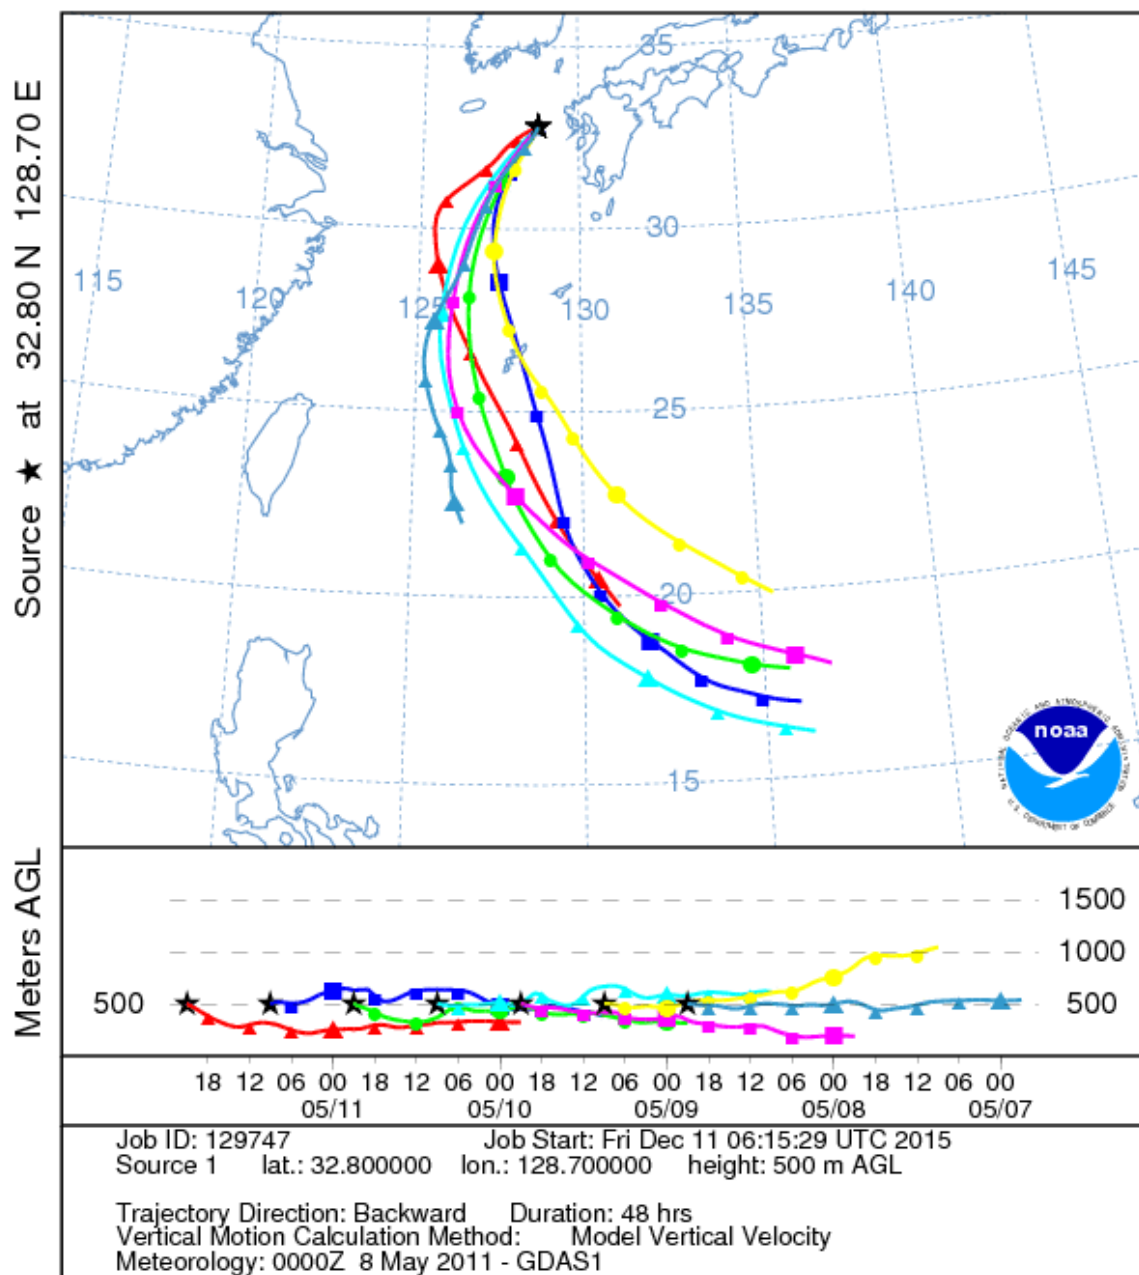

Figure S-5. Back trajectories of air masses arriving at Fukue during the low mixing ratio episode of ozone (May 9 to 11).

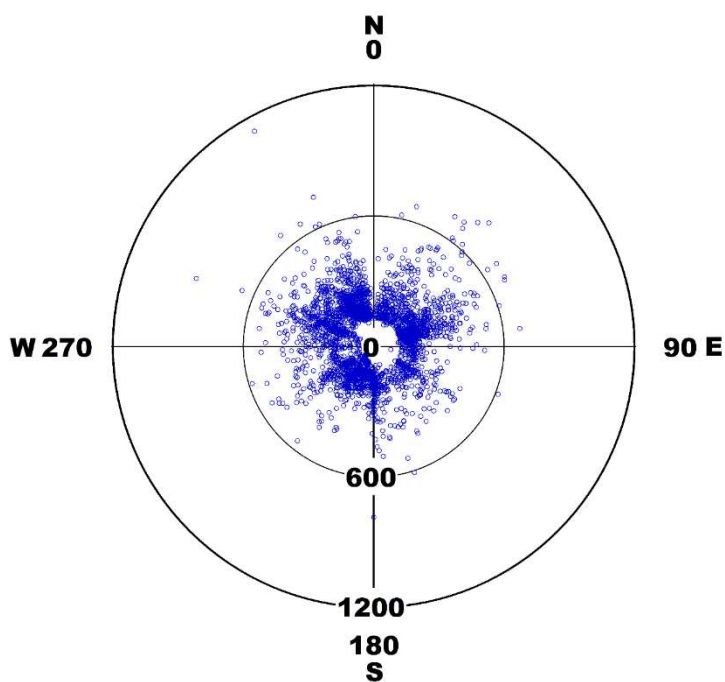

Figure S-6. Wind-sector dependence (north = 0 degrees, east = 90 degrees) of CO mixing ratio (the radial axis in ppbv).

**Table S-1. Observations of chemical species concentration rise during the seven primary emission episodes indicated by CO mixing ratio<sup>a</sup>**

|                             | episode 1   | episode 2        | episode 3  | episode 4 | episode 5  | episode 6      | episode 7  |
|-----------------------------|-------------|------------------|------------|-----------|------------|----------------|------------|
| beginning <sup>b</sup>      | 12/21 18:00 | 2/1 1:00         | 3/28 20:00 | 4/15 5:00 | 4/24 6:00  | 5/1 4:00       | 5/12 9:00  |
| end <sup>b</sup>            | 12/24 7:00  | 2/11 10:00       | 4/2 13:00  | 4/17 1:00 | 4/25 16:00 | 5/6 4:00       | 5/19 17:00 |
| particulate SO <sub>4</sub> |             | n/a <sup>c</sup> | ✓          | ✓         |            | ✓              | ✓          |
| particulate Org             |             | n/a <sup>c</sup> | ✓          | ✓         |            | ✓              |            |
| particulate NO <sub>3</sub> | ✓           | n/a <sup>c</sup> | ✓          |           |            | ✓              |            |
| particulate NH <sub>4</sub> | ✓           | n/a <sup>c</sup> | ✓          |           |            | ✓              | ✓          |
| NO <sub>x</sub>             | ✓           |                  |            |           |            | ✓              | ✓          |
| NO <sub>y</sub>             | ✓           | ✓                | ✓          | ✓         |            | ✓              | ✓          |
| O <sub>3</sub>              | ✓           | ✓                | ✓          |           |            | ✓ <sup>d</sup> | ✓          |
| ethylene                    | ✓           | ✓                | ✓          | ✓         |            | ✓              | ✓          |
| benzene                     | ✓           | ✓                | ✓          | ✓         | ✓          | ✓              | ✓          |
| toluene                     | ✓           |                  | ✓          | ✓         | ✓          | ✓              | ✓          |

<sup>a</sup>A check mark indicates confirmation of concentration rises. <sup>b</sup>Time is in local time. <sup>c</sup>n/a indicates no data available during the episode. <sup>d</sup>Diurnal variation was observed.



NOAA HYSPLIT MODEL  
Backward trajectories ending at 2200 UTC 23 Dec 10  
GDAS Meteorological Data

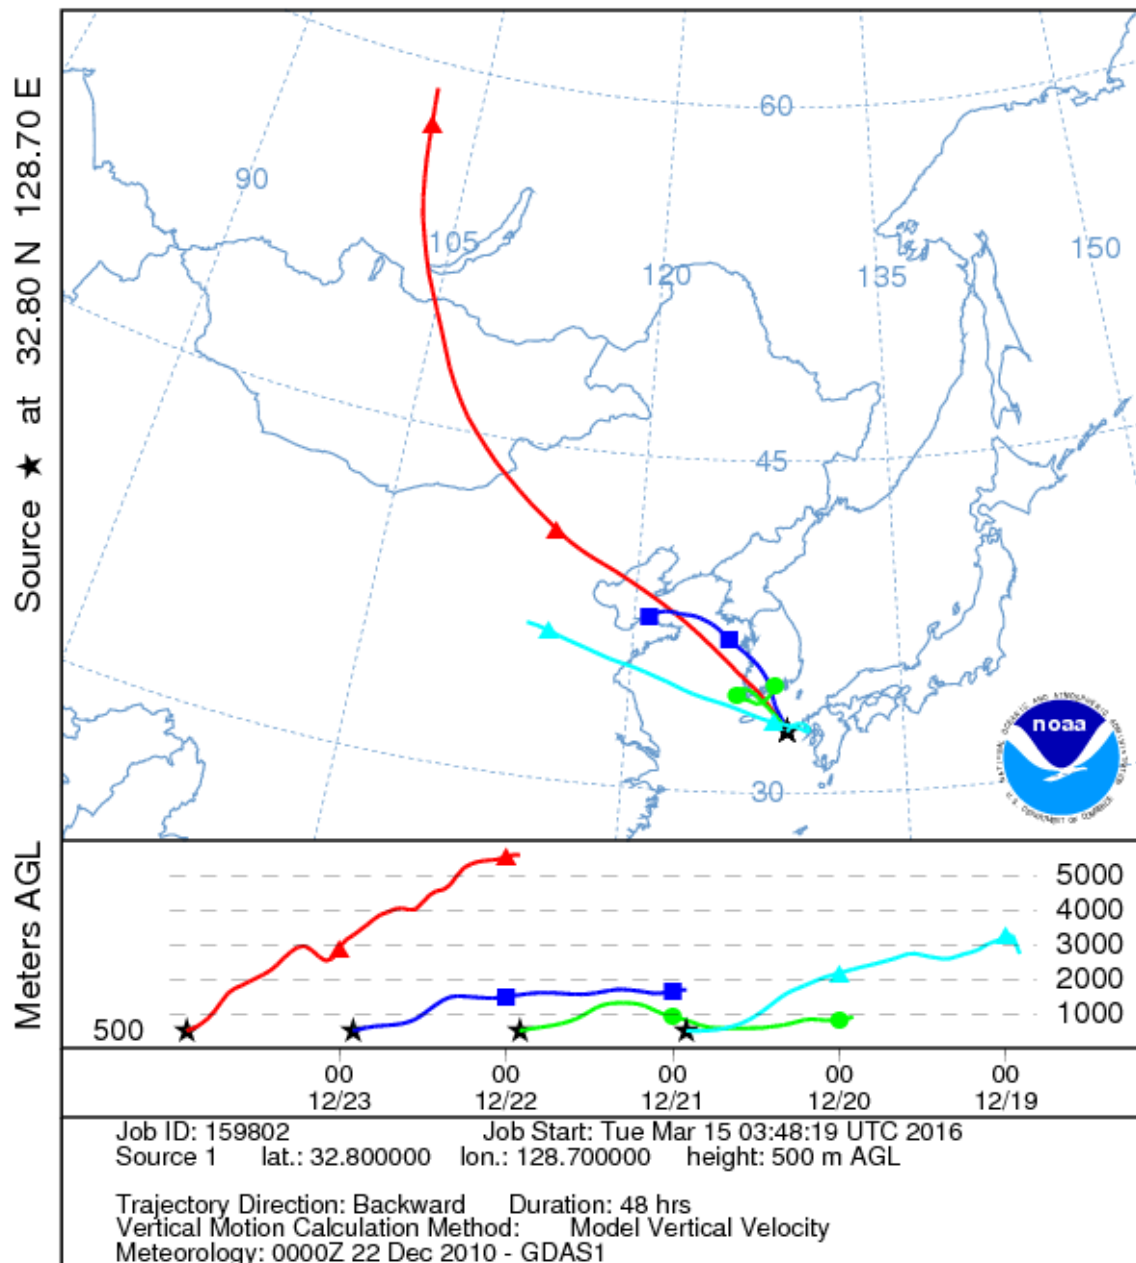

Figure S-7. 48h back trajectories of air masses during the episode 1. See Table S-1 for the detail of episode period.

NOAA HYSPLIT MODEL  
Backward trajectories ending at 0100 UTC 11 Feb 11  
GDAS Meteorological Data

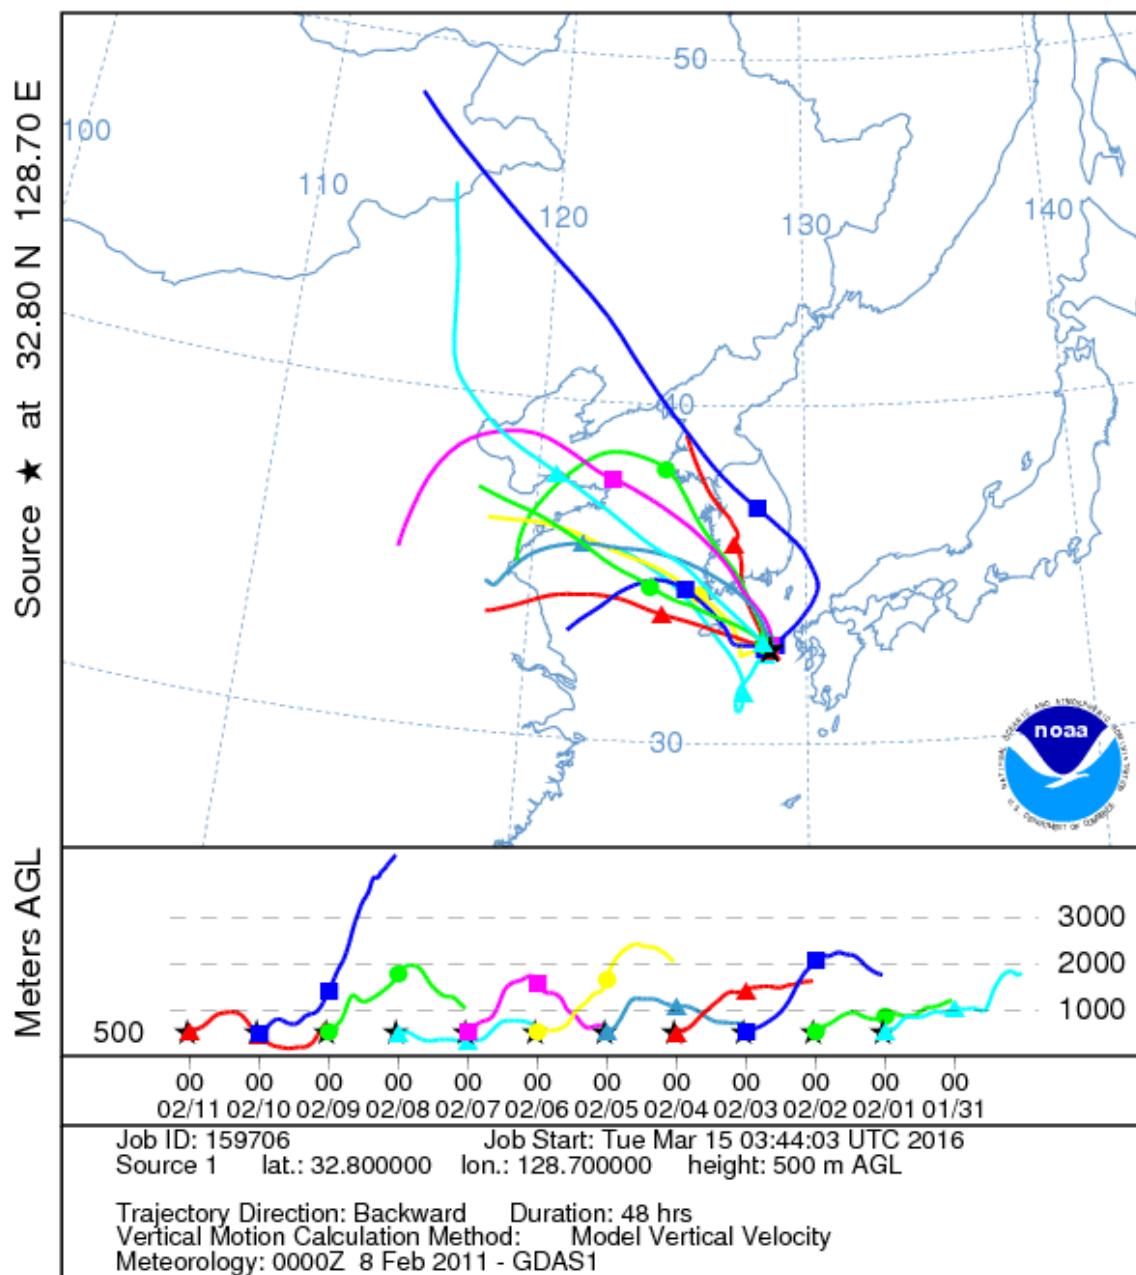

Figure S-8. 48h back trajectories of air masses during the episode 2. See Table S-1 for the detail of episode period.

NOAA HYSPLIT MODEL  
Backward trajectories ending at 0400 UTC 02 Apr 11  
GDAS Meteorological Data

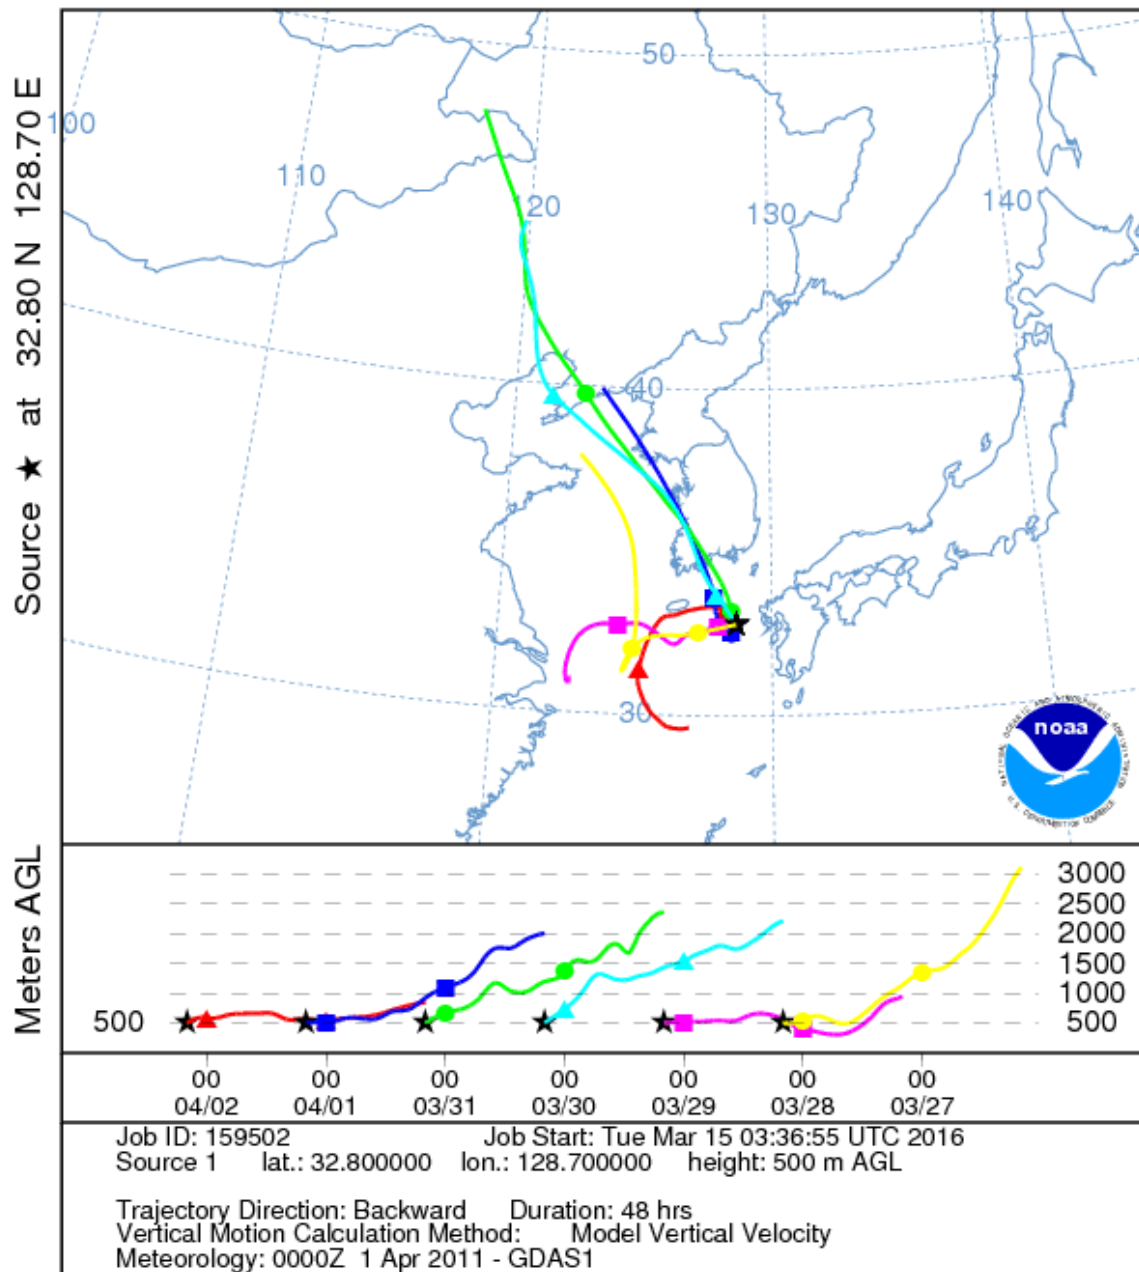

Figure S-9. 48h back trajectories of air masses during the episode 3. See Table S-1 for the detail of episode period.

NOAA HYSPLIT MODEL  
Backward trajectories ending at 1600 UTC 16 Apr 11  
GDAS Meteorological Data

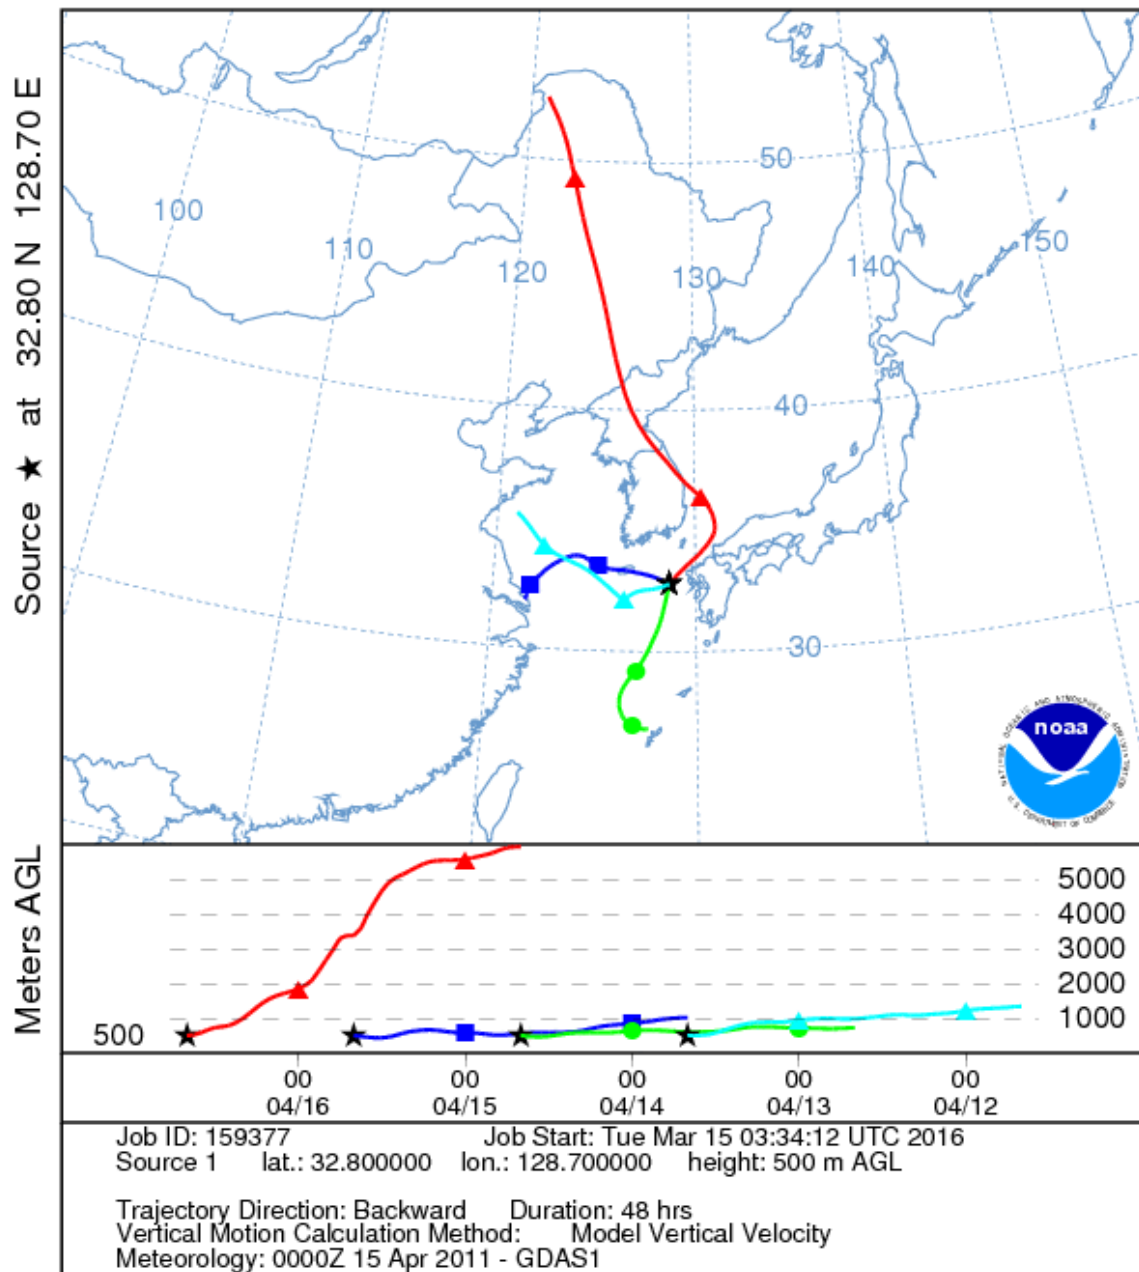

Figure S-10. 48h back trajectories of air masses during the episode 4. See Table S-1 for the detail of episode period.

NOAA HYSPLIT MODEL  
Backward trajectories ending at 0700 UTC 25 Apr 11  
GDAS Meteorological Data

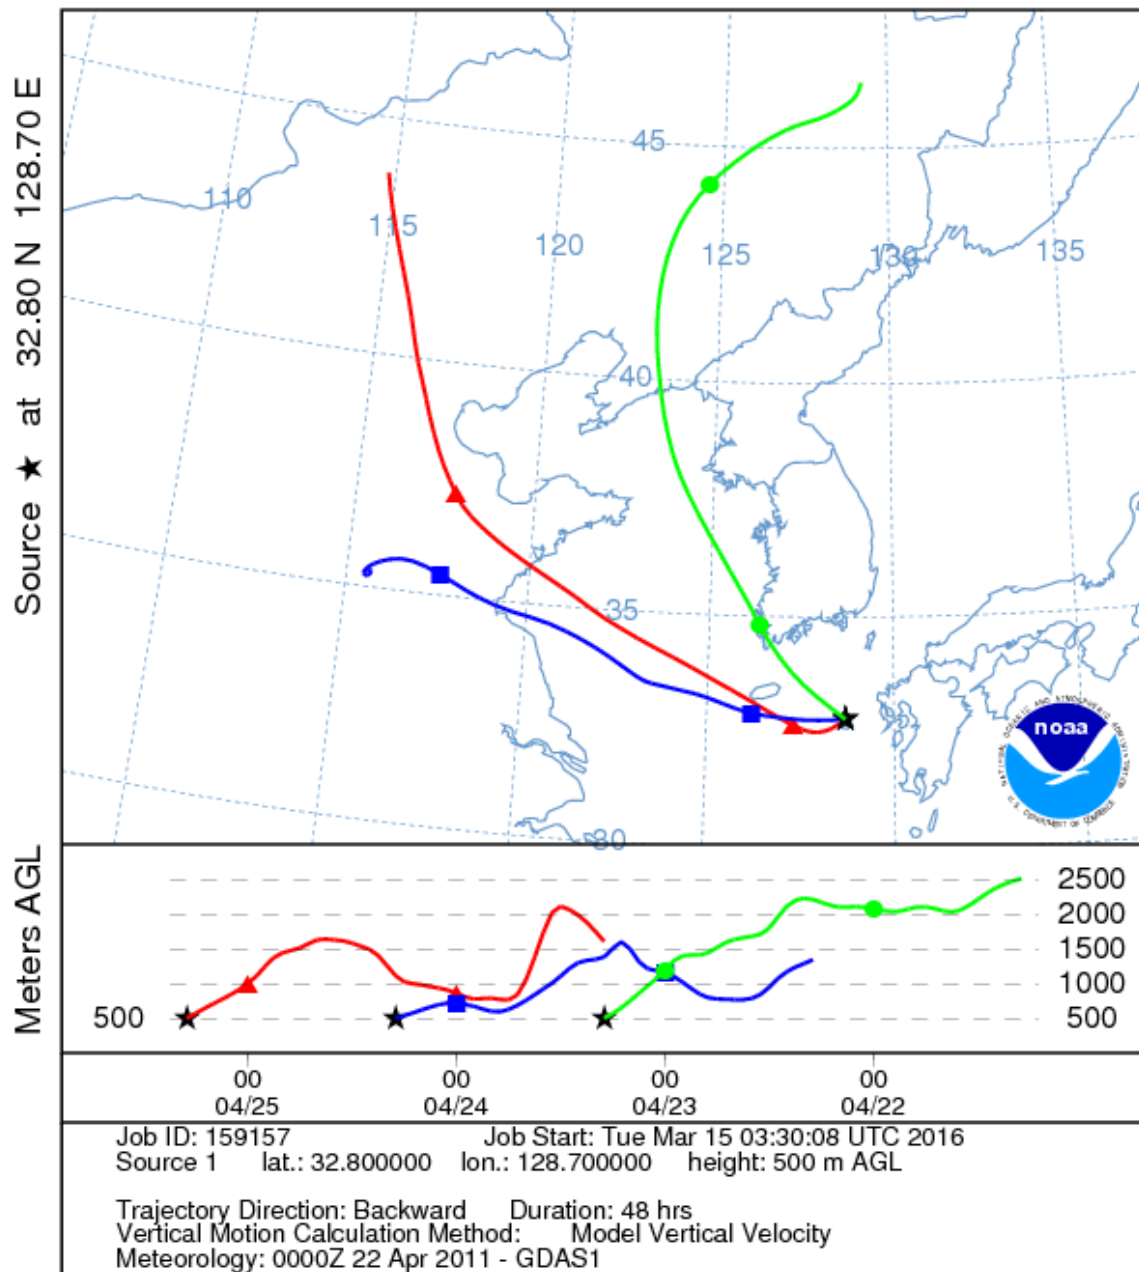

Figure S-11. 48h back trajectories of air masses during the episode 5. See Table S-1 for the detail of episode period.

NOAA HYSPLIT MODEL  
Backward trajectories ending at 1900 UTC 05 May 11  
GDAS Meteorological Data

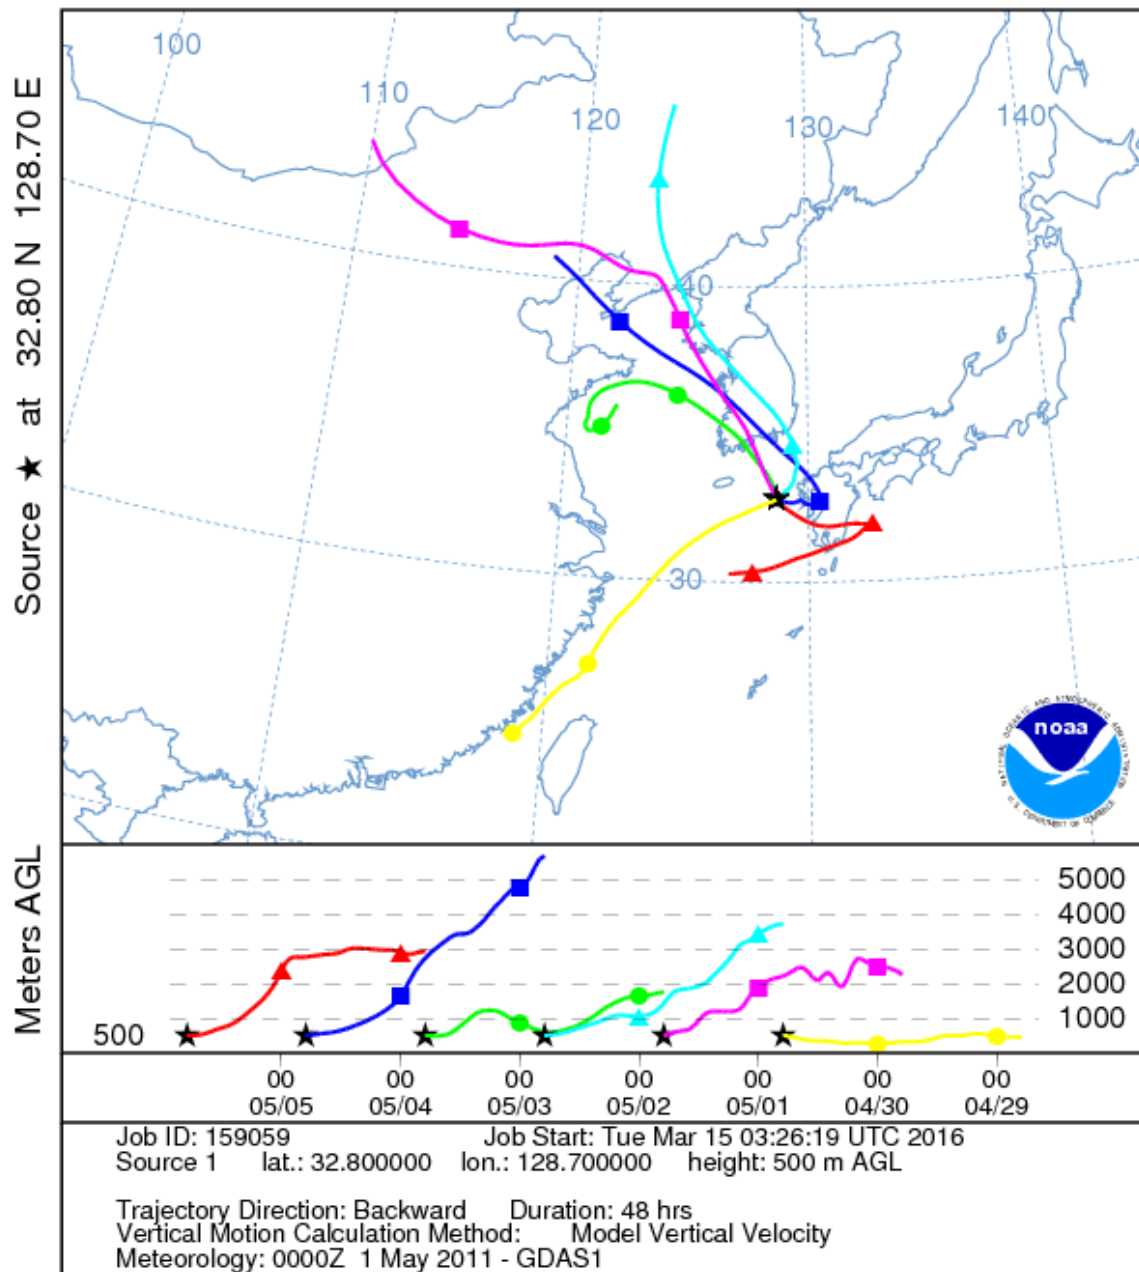

Figure S-12. 48h back trajectories of air masses during the episode 6. See Table S-1 for the detail of episode period.

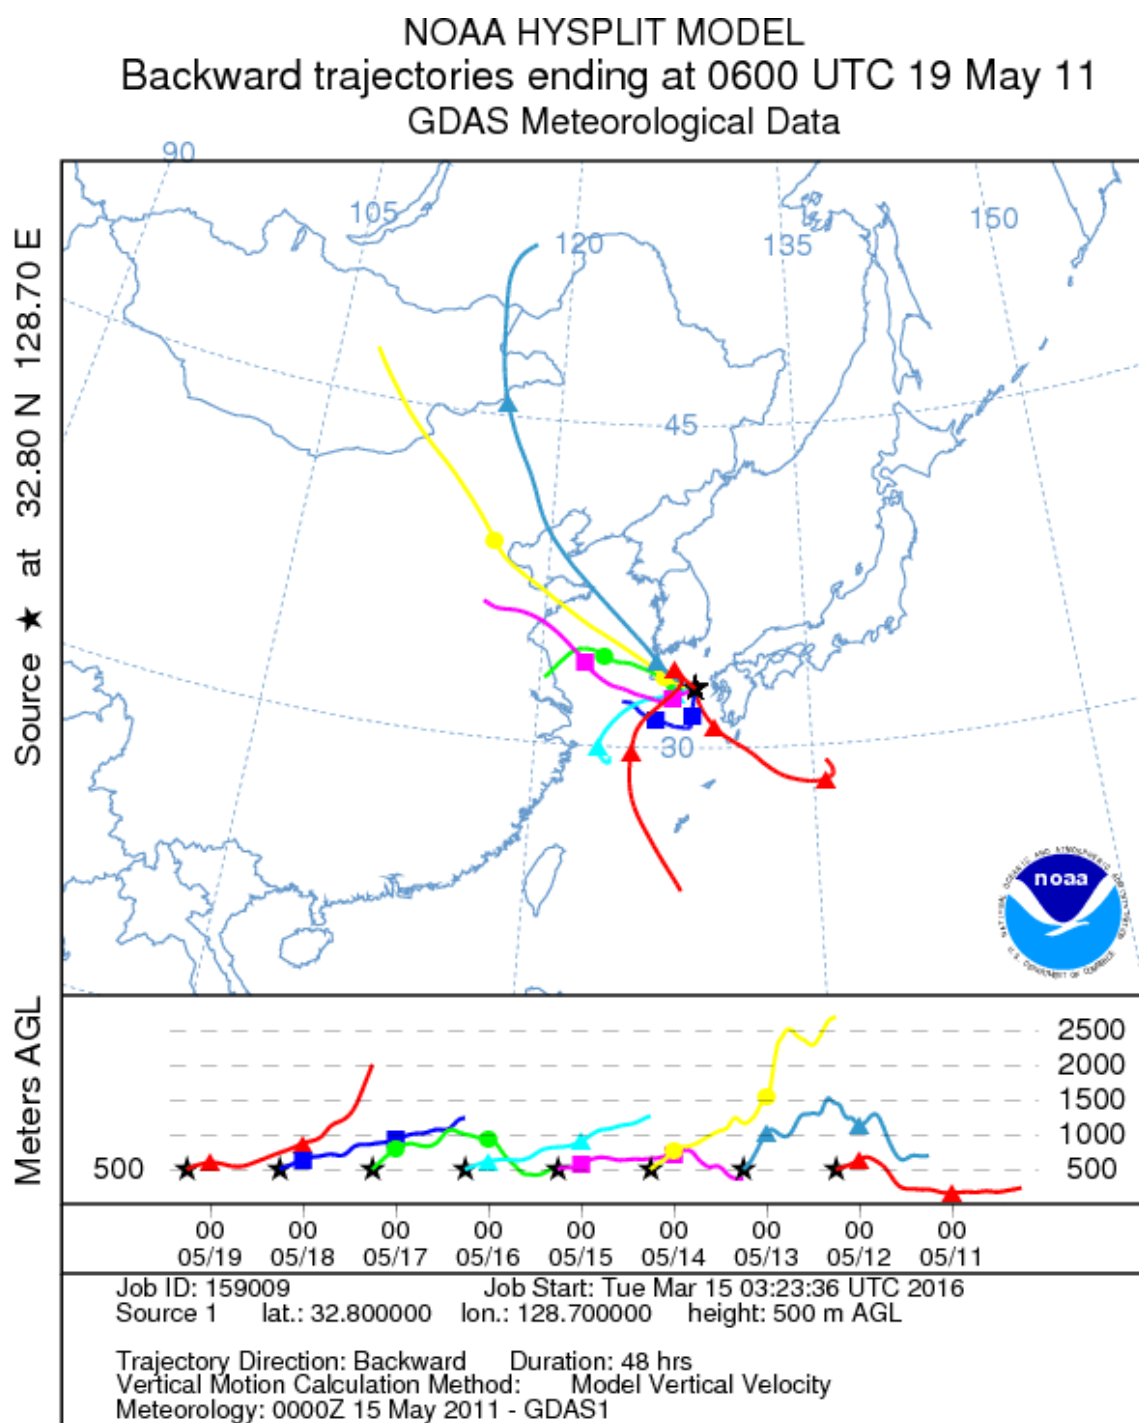

Figure S-13. 48h back trajectories of air masses during the episode 7. See Table S-1 for the detail of episode period.



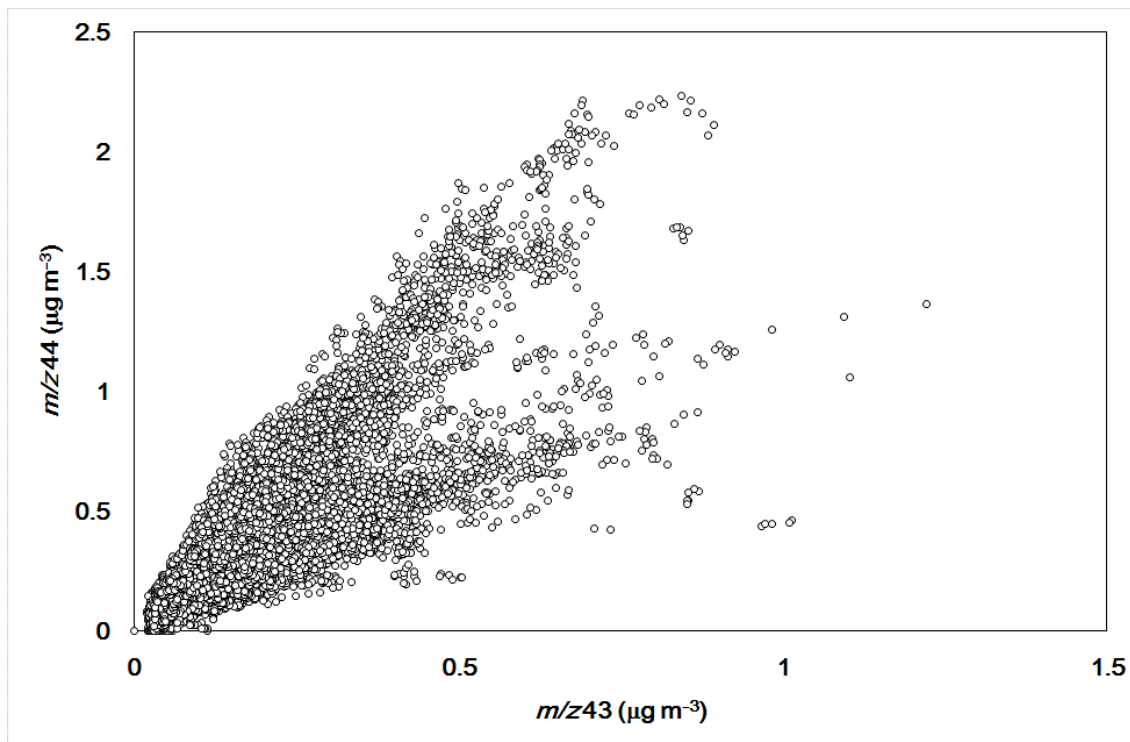

Figure S-14. Scatter plot of hourly averaged  $m/z$  44 concentrations of organics as function of hourly averaged  $m/z$  43 concentrations of organics.

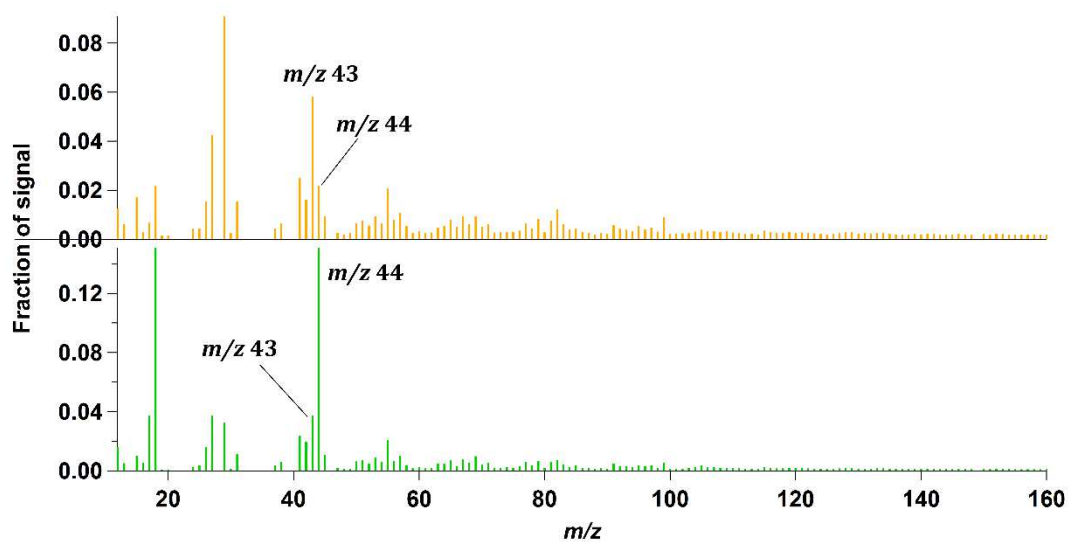

Figure S-15. Extracted mass spectra from two-factorial PMF analysis on organic aerosol mass spectra obtained from January 8 to February 2, 2011: top (orange), mass spectra identified as semi-volatile oxygenated organic aerosol (SV-OOA); bottom (green), mass spectra identified as low-volatile oxygenated organic aerosol (LV-OOA).



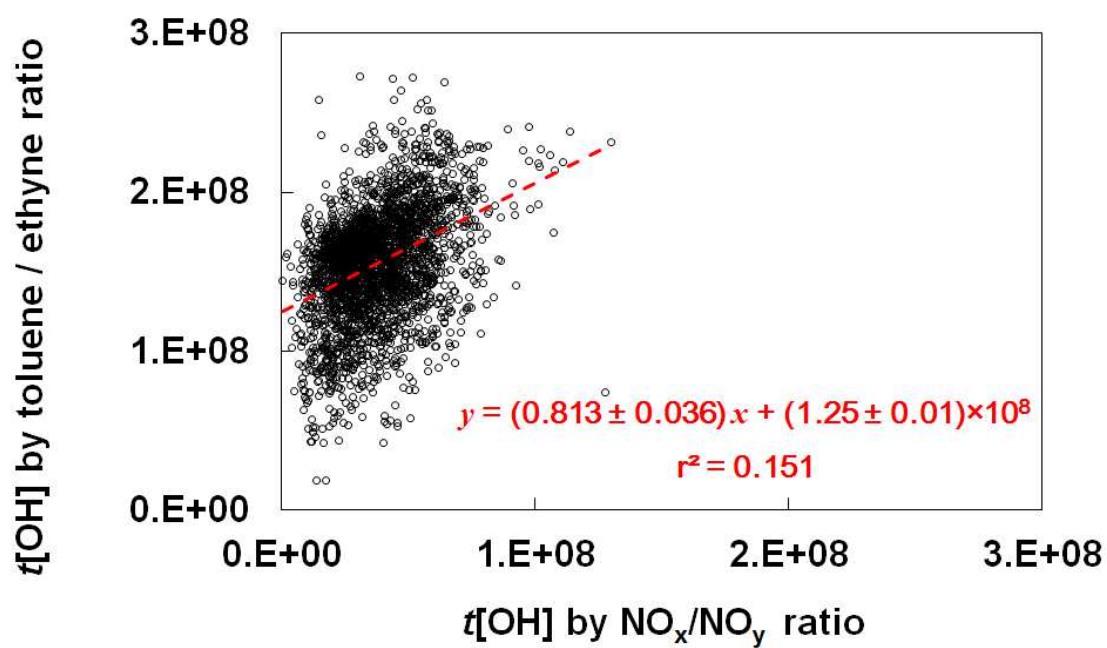

Figure S-16. Scatter plot of  $t[\text{OH}]$  estimated by  $\text{NO}_x/\text{NO}_y$  clock and toluene/ethyne clock.
